# Supplementary material
Source: PubMed Central journal article supplement (PMC6927481)

Supplementary Figure S1

Example of Approach Used to Calculate Area-Under-the-Curve (AUC)

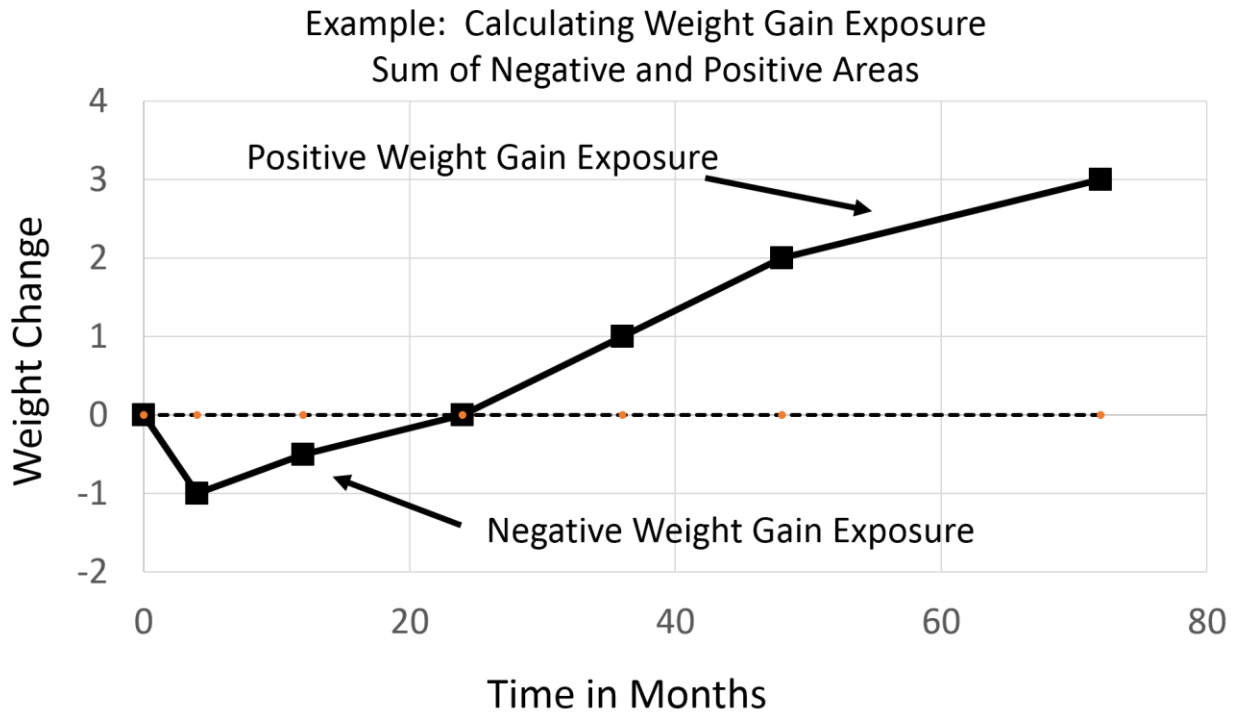

Supplement: NIHMS1051426-supplement-Supp_FigS1.pdf [file NIHMS1051426-supplement-Supp_FigS1.pdf]
